# Supplementary material for: A Perspective on the (Rise and Fall of) Protein β-Turns
Source: MDPI journal article supplement (doi:10.3390/ijms232012314), 2022-10-14
Supplement: s1 [file s1]

**Title:** A perspective on the (rise and fall of) protein  $\beta$ -turns.

**Author:** Alexandre G. de Brevern

**List 1.** Links to songs presented in the manuscript. Last accessed 2022-09-14.

1. The Rolling Stones - *Paint It Black - Live official* (Official Music Video); <https://youtu.be/50u9bxRwBJI> [1].
2. Joy Division - *Atmosphere* (Official Music Video); <https://youtu.be/1EdUjlawLJM> [2].
3. Dead Or Alive - *You Spin Me Round (Like a Record)* (Official Music Video); <https://youtu.be/PGNiXGX2nLU> [3].
4. U2 - *With Or Without You* (Official Music Video); <https://youtu.be/ujNeHlo7oTE> [4].
5. Dire Straits - *Money For Nothing* (Official Music Video); [https://youtu.be/wTP2RUD\\_cL0](https://youtu.be/wTP2RUD_cL0) [5].
6. Zager & Evans - *In the Year 2525 (Exordium & Terminus)* (Provided by RCA/Legacy); <https://youtu.be/l3yDLvp9le0> [6].
7. Ringo Starr - *It Don't Come Easy* (Official Music Video); <https://youtu.be/UDcZxEpA9XY> [7].
8. Joy Division - *She's Lost Control – Live* (Official Music Video); <https://youtu.be/Icjmp0WUOlK> [8].
9. Nina Simone - *Feeling Good* (Official Music Video); <https://youtu.be/oHRNrgDIJfo> [9].
10. The Doors - *The End (Mono, 2017 Remaster)* (Official Music Video); <https://youtu.be/NOW7i7aWQoE> [10]).

## References

1. Jagger, M.; Richards, K. Paint it black. In *Rolling Stones - Aftermath*, 1966.
2. Summer, B.; Hook, P.; Morris, S.; Curtis, I. Atmosphere. In *Joy Division - Atmosphere*, 1980.
3. Burns, P.; Coy, S.; Hussey, W.; Lever, T.; Percy, M. You spin me round (like a record). In *Dead or Alive - Youthquake*, 1984.
4. Bono. With or without you. In *U2 - The Joshua Tree*, 1987.
5. Knopfler, M.; Sting. Money for nothing. In *Dire Straits - Brothers in Arms*, 1985.
6. Evans, R. In the year 2525 (exordium & terminus). In *Zager and Evans - 2525 (Exordium & Terminus)*, 1969.
7. Starr, R. It don't come easy. In *Ringo Starr - Ringo*, 1973.
8. Summer, B.; Hook, P.; Morris, S.; Curtis, I. She's lost control. In *Joy Division - Unknown Pleasures*, 1979.
9. Newley, A.; Bricusse, L. Feeling good. In *Nina Simone - I Put a Spell on You*, 1965.
10. Morrison, J.; Manzarek, R.; Krieger, R.; Densmore, J. The end. In *The Doors - The Doors*, 1967.
